# Supplementary material for: Novel Structures of Type 1 Glyceraldehyde-3-phosphate Dehydrogenase from Escherichia coli Provide New Insights into the Mechanism of Generation of 1,3-Bisphosphoglyceric Acid
Source: MDPI journal article supplement (doi:10.3390/biom11111565), 2021-10-22
Supplement: s1 [file s1]

# Crystal Structure of Type1 Glyceraldehyde-3-Phosphate Dehydrogenase from *Escherichia coli* Provides New Insight into BPG Generation and Catalytic Mechanism

Li Zhang<sup>1</sup>, Meiruo Liu<sup>1</sup>, Luyao Bao<sup>1</sup>, Kristina I. Boström<sup>2</sup>, Yucheng Yao<sup>2</sup>, Jixi Li<sup>1</sup>, Shaohua Gu<sup>1</sup> and Chaoneng Ji<sup>1,3\*</sup>

<sup>1</sup> State Key Laboratory of Genetic Engineering, School of Life Sciences, Fudan University, Shanghai, 200438, People's Republic of China Li Zhang email: lizhang1@g.ucla.edu; Meiruo Liu email: mandymrliu@gmail.com, Luyao Bao email: baoly@fudan.edu.cn Jixi Li email: lijixi@fudan.edu.cn Shaohua Gu shaohuagu@fudan.edu.cn

<sup>2</sup> Division of Cardiology, David Geffen School of Medicine at UCLA, Los Angeles, CA, 90095-1679, USA Kristina I. Boström email: kbostrom@mednet.ucla.edu Yucheng Yao email: yyao@mednet.ucla.edu

<sup>3</sup> Shanghai Engineering Research Center of Industrial Microorganisms, Shanghai, 200438, People's Republic of China

\* Correspondence e-mail: chnji@fudan.edu.cn

## Supplementary Materials:

Table S1 Sequence of mutants' primers

| Primer name | Primer oligo 5'-3'                       |
|-------------|------------------------------------------|
| C150S-F     | CCATTGTTTCCGTGGCGTCATCAACCACTAACTGTCTTG  |
| C150S-R     | CAAGACAGTTAGTGGTTGATGACGCCACGGAAACAATGG  |
| C150A-F     | GACACCATTGTTTCCGTGGCGTCAGCAACCACTAACTGTC |
| C150A-R     | GACAGTTAGTGGTTGCTGACGCCACGGAAACAATGGTGTC |
| H177A-F     | CACGATGACGACCATTGCAGCCTATACTGGCACCCAGTC  |
| H177A-R     | GACTGGGTGCCAGTATAGGCTGCAATGGTCGTCATCGTG  |

Table S2 The composition of the precipitant solutions used to obtain protein crystals

| Crystal name              | Crystallization conditions                                                   |
|---------------------------|------------------------------------------------------------------------------|
| WT.NAD                    | 100 mM sodium acetate pH4.6, 30%(w/v) PEG400, 200 mM Ca(OAC) <sub>2</sub>    |
| C150S.NAD                 | 100 mM sodium acetate pH4.5, 30% (w/v) PEG400, 200 mM Ca(OAC) <sub>2</sub>   |
| C150A.NAD                 | 100 mM sodium Cacodylate pH 6.3, 18% (w/v) PEG1000, 200 mM MgCl <sub>2</sub> |
| H177A.NAD                 | 100 mM sodium cacodylate pH 6.5, 18%(w/v) PEG1000, 200 mM MgCl <sub>2</sub>  |
| C150A+H177A.NAD           | 100 mM sodium cacodylate pH 6.3, 20%(w/v) PEG1000, 200 mM MgCl <sub>2</sub>  |
| WT.NAD.PO <sub>4</sub>    | 100 mM sodium PBS pH 6.1, 16%(w/v) PEG1000, 200 mM MgCl <sub>2</sub>         |
| C150A.NAD.PO <sub>4</sub> | 100 mM sodium cacodylate pH 6.3, 20%(w/v) PEG1000, 200 mM MgCl <sub>2</sub>  |
| C150S.NAD.PO <sub>4</sub> | 100 mM sodium cacodylate pH 6.3, 20%(w/v) PEG1000, 200 mM MgCl <sub>2</sub>  |
| WT.NAD.G3P                | 100 mM sodium PBS pH 6.1, 16%(w/v) PEG1000, 200 mM MgCl <sub>2</sub>         |
| C150S. NAD.G3P            | 100 mM sodium PBS pH 6.1, 16%(w/v) PEG1000, 200 mM MgCl <sub>2</sub>         |
| C150A+H177A.G3P           | 100 mM sodium PBS pH 6.6, 16%(w/v) PEG1000, 200 mM MgCl <sub>2</sub>         |
| Thioacyl intermediate     | 100 mM sodium PBS pH 6.6, 16%(w/v) PEG1000, 200 mM MgCl <sub>2</sub>         |
| C150S.NAD.BPG             | 100 mM sodium PBS pH 6.2, 16%(w/v) PEG1000, 200 mM MgCl <sub>2</sub>         |
| H177A.NAD.BPG             | 100 mM sodium PBS pH 6.6, 16%(w/v) PEG1000, 200 mM MgCl <sub>2</sub>         |

Table S3 X - ray data collection and refinement statistics

|                               | Holoenzyme                           |                                     |                                     |                                       | Ternary complex                       |                                       |
|-------------------------------|--------------------------------------|-------------------------------------|-------------------------------------|---------------------------------------|---------------------------------------|---------------------------------------|
|                               | C150S.NAD                            | C150A.NAD                           | H177A.NAD                           | C150A+H177A.NAD                       | C150S.NAD.PO <sub>4</sub>             | C150A.NAD.PO <sub>4</sub>             |
| Data collection               |                                      |                                     |                                     |                                       |                                       |                                       |
| PDB code                      | 7C5L                                 | 7C5J                                | 7C5O                                | 7C5N                                  | 7C5G                                  | 7C5I                                  |
| Wavelength(Å)                 | 0.9776                               | 0.97776                             | 0.97776                             | 0.97776                               | 0.97776                               | 0.97776                               |
| Resolution range(Å)           | 50-2.1<br>(2.14-2.1) <sup>a</sup>    | 50-1.98<br>(2.01-1.98)              | 50-1.98<br>(2.01-1.98)              | 50-1.99<br>(2.02-1.99)                | 50-1.98<br>(2.01-1.98)                | 50-2.49<br>(2.53-2.49)                |
| Space group                   |                                      |                                     |                                     | P4 <sub>1</sub> 2 <sub>1</sub> 2      |                                       |                                       |
| Unit-cell paramters<br>(Å, °) | a=b=89.40,<br>c=340.266,<br>α=β=γ=90 | a=b=90.0,<br>c=340.867,<br>α=β=γ=90 | a=b=89.97,<br>c=342.25,<br>α=β=γ=90 | a=b=89.376,<br>c=341.506,<br>α=β=γ=90 | a=b=90.124,<br>c=340.648,<br>α=β=γ=90 | a=b=89.679,<br>c=341.261,<br>α=β=γ=90 |

|                                               |                           |                           |                           |                           |                           |                           |
|-----------------------------------------------|---------------------------|---------------------------|---------------------------|---------------------------|---------------------------|---------------------------|
| Completeness (%)                              | 100(100)                  | 90.9(87.2)                | 99.1(97.4)                | 100(100)                  | 90.8(83.6)                | 100 (100)                 |
| R <sub>merge</sub> (%)                        | 17.4(54.9)                | 17(56.5)                  | 17.9(48.9)                | 20.8(88)                  | 17.1(55.9)                | 19.6(77.6)                |
| Mean I/σ                                      | 19.7(4.33)                | 10.9(2.5)                 | 21.3(6.75)                | 18.5(5.25)                | 13.6(3.4)                 | 12(4)                     |
| No. unique reflections                        | 82932                     | 89856                     | 98318                     | 96080                     | 90257                     | 50448                     |
| Redundancy                                    | 19.4                      | 8.7                       | 20                        | 19.5                      | 13.6                      | 19.2                      |
| Refinement                                    |                           |                           |                           |                           |                           |                           |
| Resolution range(Å)                           | 47.89-2.09<br>(2.17-2.09) | 48.05-1.98<br>(2.05-1.98) | 43.51-1.98<br>(2.05-1.98) | 44.69-1.99<br>(2.06-1.99) | 44.67-1.98<br>(2.05-1.98) | 48.03-2.48<br>(2.57-2.48) |
| R <sub>work</sub> /R <sub>free</sub> (%)      | 15.62/19.97               | 15.47/20.14               | 15.7/19.86                | 16.71/21.77               | 15.46/20.26               | 16.74/22.31               |
| Wilson B-factor (Å <sup>2</sup> )             | 21.4                      | 18.7                      | 24                        | 24.7                      | 18.86                     | 32.08                     |
| average B factor(Å <sup>2</sup> )             | 23.87                     | 20.7                      | 26.31                     | 27.3                      | 20.21                     | 33.42                     |
| B factor(Å <sup>2</sup> )                     |                           |                           |                           |                           |                           |                           |
| Protein                                       | 23.45                     | 20.19                     | 25.66                     | 26.48                     | 19.75                     | 33.68                     |
| Water                                         | 28.69                     | 25.98                     | 31.76                     | 33.58                     | 25.22                     | 27.98                     |
| NAD <sup>+</sup> , PO <sub>4</sub> , G3P, BPG | 21.62                     | 17.9                      | 30.03                     | 34.18                     | 18.32                     | 35.21                     |
| No. NAD/PO <sub>4</sub> /G3P/BPG              | 4/0/0/0                   | 4/0/0/0                   | 4/0/0/0                   | 4/0/0/0                   | 4/5/0/0                   | 4/8/0/0                   |
| No. water molecules                           | 987                       | 1072                      | 990                       | 1104                      | 995                       | 544                       |
| Root mean square deviation                    |                           |                           |                           |                           |                           |                           |
| (Bond lengths(Å))                             | 0.017                     | 0.017                     | 0.02                      | 0.019                     | 0.031                     | 0.042                     |
| Bond angles(deg)                              | 1.82                      | 1.8                       | 1.93                      | 1.86                      | 1.82                      | 1.62                      |
| Ramachandran Plot (%)                         |                           |                           |                           |                           |                           |                           |
| favored                                       | 97                        | 97                        | 97                        | 96                        | 96                        | 95                        |
| outliers                                      | 0.075                     | 0                         | 0                         | 0                         | 0                         | 0.075                     |
| Rotamer outliers (%)                          | 0                         | 1                         | 0.91                      | 0.075                     | 1.3                       | 0.73                      |
| Clash core                                    | 2.31                      | 1.45                      | 1.89                      | 2.17                      | 2.02                      | 1.88                      |

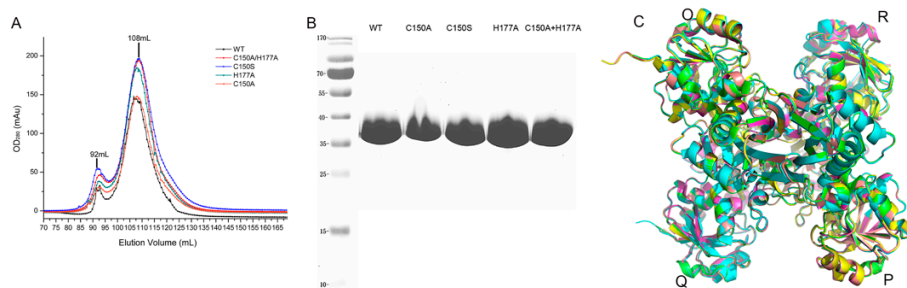

**Figure S1** Purification and enzyme characteristics of *EcGAPDH1* mutants A. Gel filtration profile of *EcGAPDH1* mutants on a Hip Trep@26/60 sephacryl S-100 high resolution column. All *EcGAPDH1* mutants were eluted at a 108 ml peak. B. After Ni-NTA affinity chromatography and gel-filtration chromatography, *EcGAPDH1* mutants were loaded on a 12% SDS-PAGE gel. C. C150S.NAD, C150A.NAD, H177A.NAD, C150A+177A.NA align to WT.NAD.

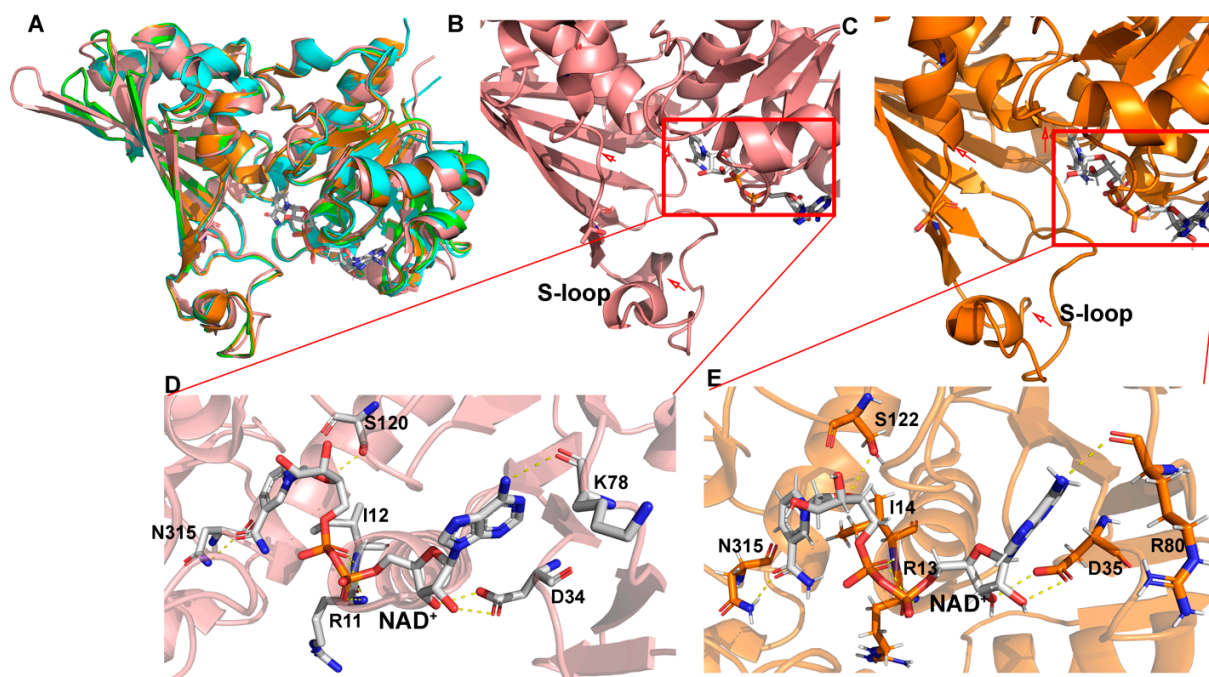

**Figure S2.** NAD<sup>+</sup> in EcGAPDH1 and GAPDH from Homo sapiens. A. Align structures of O subunit of C150S.NAD (PDB code: 7C5L, wheat), and GAPDH from homo sapiens (PDB code: 4WNC, orange)[1], Human testis (PDB code: 5C7L, cyan)[2], human liver (PDB code: 1U8F, green)[3]. B-C O subunit of C150S.NAD and GAPDH from homo sapiens (PDB code: 4WNC). D, E are the NAD<sup>+</sup> binding forms of structure B and C.

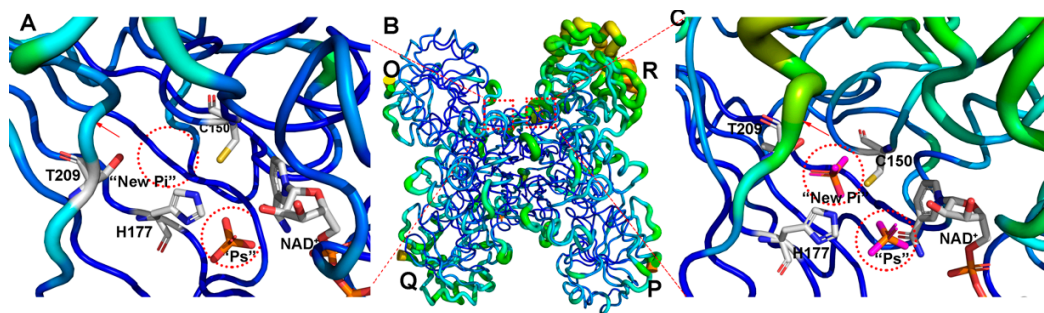

**Figure S3** B factor distribution in WT.NAD.PO<sub>4</sub>. A, C from O and R subunit of WT.NAD.PO<sub>4</sub>, respectively. The wider and redder tubing indicates a higher B-factor. The different part was marked with red circle and arrow.

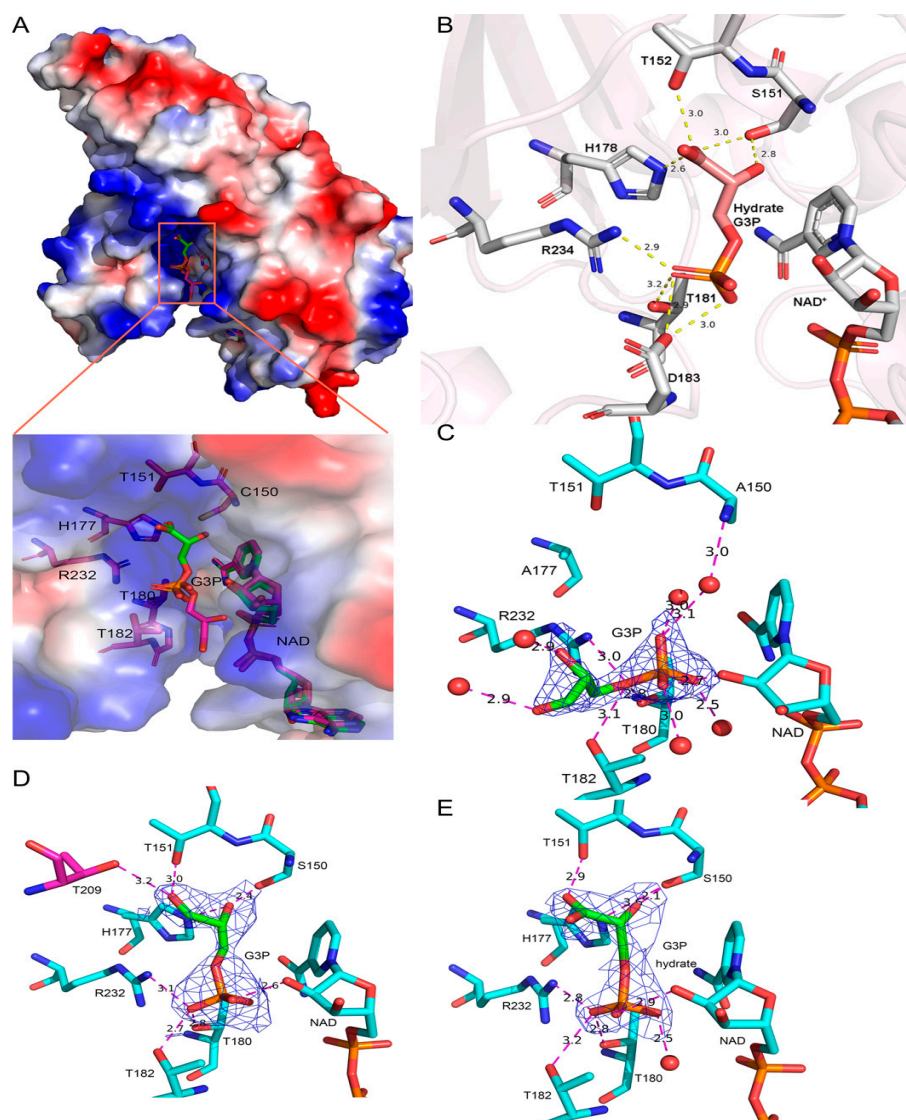

**Figure S4** The different binding forms of G3P. A. The R subunit of WT.NAD.G3P is depicted as electrostatic surface potential. Blue represents a positive potential and red depicts a negative potential. Superimposition of the R subunit of *Tm*GAPDH (3KV3) and WT.NAD.G3P shows G3P in opposing structures. G3P is shown to exist in a positively charged pocket. The top panel shows G3P as a monomer. The bottom panel shows the amino acids and NAD<sup>+</sup> interacting with G3P. B. The R subunit of *Tm*GAPDH. G3P is in a gem-diol form (hydrate form). C. A stereo-view of simulated annealing (2mFo-DFc) omit map of G3P; the map is contoured at 1.0  $\sigma$  in the Q subunit of C150A+H177A.NAD.G3P. The polar interactions (shown in magenta) of G3P with water molecules, NAD<sup>+</sup>, and amino acid residues are highlighted. The O, Q subunit of C150S.NAD.G3P show same express way with Q subunit of C150A+H177A.NAD.G3P. D. C150S.NAD.G3P (Chain O). E. C150S.NAD.G3P (Chain Q); G3P is in hydrate form. C, D. G3P is in aldehyde form. E. Superimposition of G3P as mentioned above. G3P molecules are shown as sticks and the subunit is the surface.



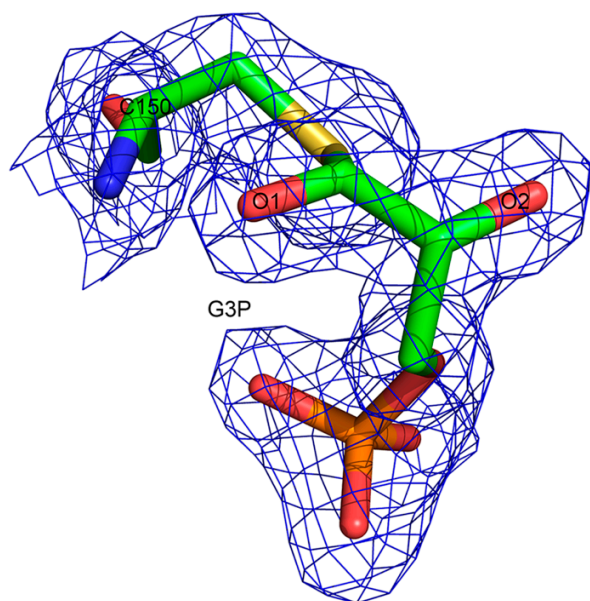

**Figure S5** Structure of thioacyl intermediate. Stereo-view of simulated annealing omit (2Fo-DFc) map of the thioacyl intermediate contoured at 1.0  $\sigma$ .

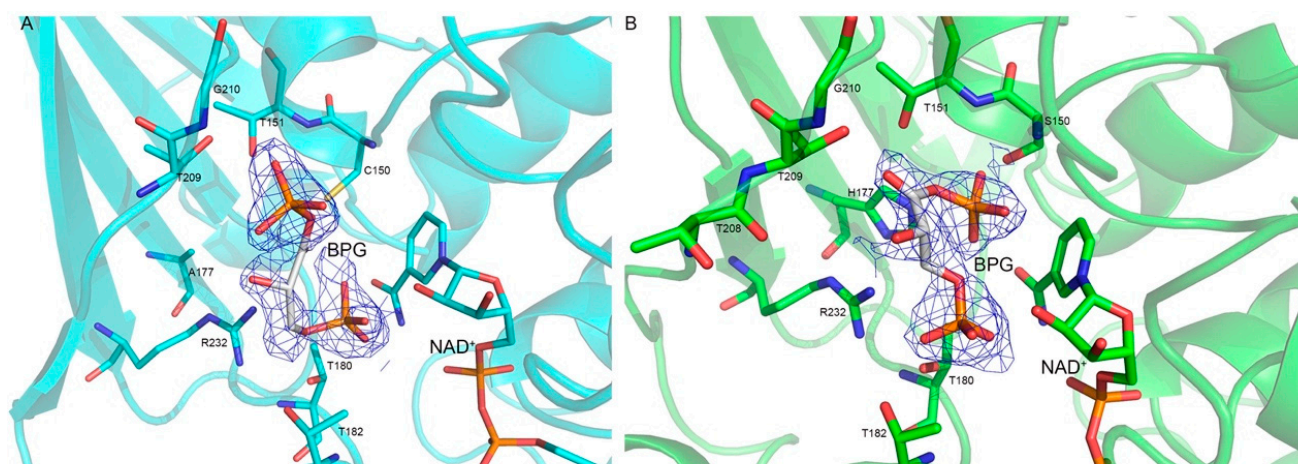

**Figure S6** Structure of GAPDH binding BPG. A-B. Stereo-view of simulated annealing omit (2Fo-DFc) map of the P subunit of H177A.NAD.BPG and O subunit of C150S.NAD.BPG contoured at 0.9 sigma. Cartoon representation of the overall structure is shown. The amino acids that interact with BPG are shown as sticks.
